# Supplementary material for: Enhanced visible light photocatalytic performance of a novel heterostructured Bi4Ti3O12/BiOBr photocatalyst
Source: Royal Society of Chemistry journal article supplement (doi:10.1039/c9nj02723h), 2019-01-01
Supplement: c9nj02723h1.pdf [file c9nj02723h1.pdf]

## Supplementary Materials for

### Enhanced visible light photocatalytic performance of a novel heterostructured $\text{Bi}_4\text{Ti}_3\text{O}_{12}/\text{BiOBr}$ photocatalyst

Guodong Shen,<sup>a,b</sup> Yongping Pu,<sup>\*a</sup> Runjun Sun,<sup>b</sup> Yu Shi,<sup>a</sup> Yongfei Cui<sup>a</sup> and Panpan Jing<sup>a</sup>

---

<sup>a</sup> School of Materials Science and Engineering, Shaanxi Key Laboratory of Green Preparation and Functionalization for Inorganic Materials, Shaanxi University of Science & Technology, Xi'an 710021, China

<sup>b</sup> School of Textile Science and Engineering, Xi'an Polytechnic University, Xi'an 710048, China

#### **This PDF file includes:**

Fig. S1 to S4

#### **List of Figures**

Fig. S1. XRD patterns of as-prepared  $\text{Bi}_4\text{Ti}_3\text{O}_{12}$  and  $\text{BiOBr}$ .

Fig. S2. XRD patterns of as-prepared  $5\text{Bi}_4\text{Ti}_3\text{O}_{12}/5\text{BiOBr}$ ,  $4\text{Bi}_4\text{Ti}_3\text{O}_{12}/6\text{BiOBr}$ ,  $3\text{Bi}_4\text{Ti}_3\text{O}_{12}/7\text{BiOBr}$ ,  $2\text{Bi}_4\text{Ti}_3\text{O}_{12}/8\text{BiOBr}$ , and  $1\text{Bi}_4\text{Ti}_3\text{O}_{12}/9\text{BiOBr}$ .

Fig. S3. SEM images of (a)  $5\text{Bi}_4\text{Ti}_3\text{O}_{12}/5\text{BiOBr}$ , (b)  $4\text{Bi}_4\text{Ti}_3\text{O}_{12}/6\text{BiOBr}$ , (c)  $3\text{Bi}_4\text{Ti}_3\text{O}_{12}/7\text{BiOBr}$ , (d)  $2\text{Bi}_4\text{Ti}_3\text{O}_{12}/8\text{BiOBr}$ , (e)  $1\text{Bi}_4\text{Ti}_3\text{O}_{12}/9\text{BiOBr}$ , and individual (f)  $5\text{Bi}_4\text{Ti}_3\text{O}_{12}/5\text{BiOBr}$  after ultrasonic concussion for 2 h, (g-i) Element mappings of individual  $5\text{Bi}_4\text{Ti}_3\text{O}_{12}/5\text{BiOBr}$ .

Fig. S4. UV-vis diffuse reflectance spectra of as-prepared  $5\text{Bi}_4\text{Ti}_3\text{O}_{12}/5\text{BiOBr}$ ,  $4\text{Bi}_4\text{Ti}_3\text{O}_{12}/6\text{BiOBr}$ ,  $3\text{Bi}_4\text{Ti}_3\text{O}_{12}/7\text{BiOBr}$ ,  $2\text{Bi}_4\text{Ti}_3\text{O}_{12}/8\text{BiOBr}$ , and  $1\text{Bi}_4\text{Ti}_3\text{O}_{12}/9\text{BiOBr}$ .

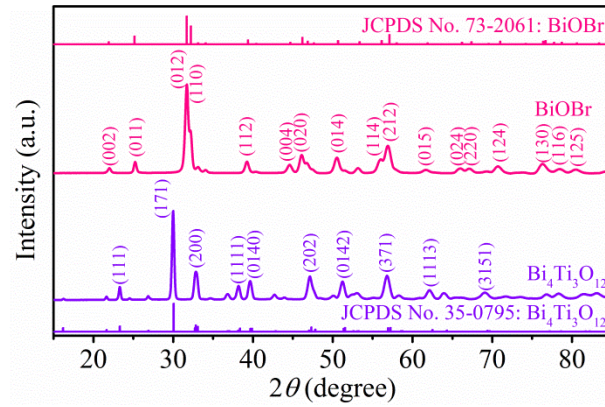

Fig. S1. XRD patterns of as-prepared  $\text{Bi}_4\text{Ti}_3\text{O}_{12}$  and  $\text{BiOBr}$ .

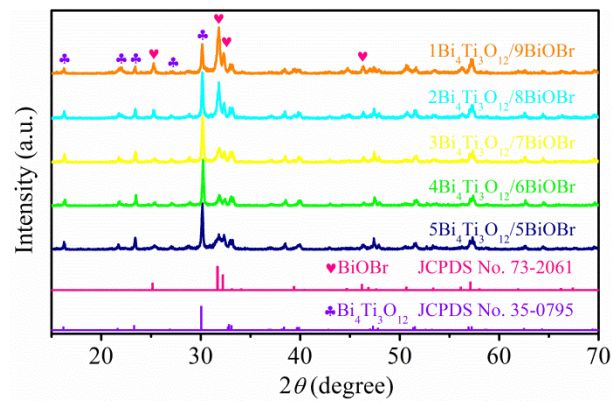

Fig. S2. XRD patterns of as-prepared  $5\text{Bi}_4\text{Ti}_3\text{O}_{12}/5\text{BiOBr}$ ,  $4\text{Bi}_4\text{Ti}_3\text{O}_{12}/6\text{BiOBr}$ ,  $3\text{Bi}_4\text{Ti}_3\text{O}_{12}/7\text{BiOBr}$ ,  $2\text{Bi}_4\text{Ti}_3\text{O}_{12}/8\text{BiOBr}$ , and  $1\text{Bi}_4\text{Ti}_3\text{O}_{12}/9\text{BiOBr}$ .

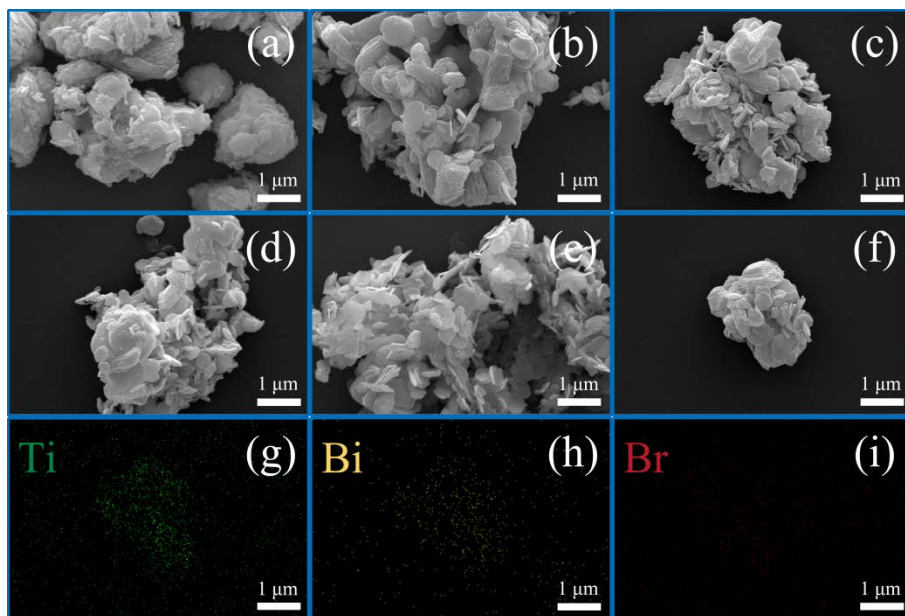

Fig. S3. SEM images of (a) 5Bi<sub>4</sub>Ti<sub>3</sub>O<sub>12</sub>/5BiOBr, (b) 4Bi<sub>4</sub>Ti<sub>3</sub>O<sub>12</sub>/6BiOBr, (c) 3Bi<sub>4</sub>Ti<sub>3</sub>O<sub>12</sub>/7BiOBr, (d) 2Bi<sub>4</sub>Ti<sub>3</sub>O<sub>12</sub>/8BiOBr, (e) 1Bi<sub>4</sub>Ti<sub>3</sub>O<sub>12</sub>/9BiOBr, and individual (f) 5Bi<sub>4</sub>Ti<sub>3</sub>O<sub>12</sub>/5BiOBr after ultrasonic concussion for 2 h, (g-i) Element mappings of individual 5Bi<sub>4</sub>Ti<sub>3</sub>O<sub>12</sub>/5BiOBr.

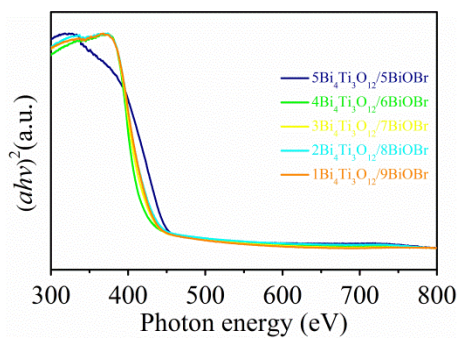

Fig. S4. UV-vis diffuse reflectance spectra of as-prepared 5Bi<sub>4</sub>Ti<sub>3</sub>O<sub>12</sub>/5BiOBr, 4Bi<sub>4</sub>Ti<sub>3</sub>O<sub>12</sub>/6BiOBr, 3Bi<sub>4</sub>Ti<sub>3</sub>O<sub>12</sub>/7BiOBr, 2Bi<sub>4</sub>Ti<sub>3</sub>O<sub>12</sub>/8BiOBr, and 1Bi<sub>4</sub>Ti<sub>3</sub>O<sub>12</sub>/9BiOBr.
